# Supplementary material
Source: PubMed Central journal article supplement (PMC3293450)
Supplement: NIHMS353077-supplement-S6.pdf [file NIHMS353077-supplement-S6.pdf]

S6 | Uncharacterized putative components of membrane remodelling systems in archaea

| arCOG number                 | System    | representative | Lineage                                    | Comment                                                  |
|------------------------------|-----------|----------------|--------------------------------------------|----------------------------------------------------------|
| ESCRT-III-based systems      |           |                |                                            |                                                          |
| arCOG08707                   | ESCRT     | Nmar_1089      | Thaumoaarchaea                             | All alpha, one coiled-coil segment                       |
| arCOG07462                   | ESCRT     | Smar_0480      | Desulfurococcales                          | Alpha +beta, no coiled-coil segments                     |
| arCOG07220                   | ESCRT     | SSO6716        | Sulfolobales                               | Mixed alpha and beta, no coiled-coil segments            |
| arCOG00731                   | ESCRT     | SSO0620        | Sulfolobales <sup>a</sup>                  | wHTH of ArsR family                                      |
| arCOG07400                   | ESCRT     | TVN0381        | Thermoplasmatales                          | Mixed alpha and beta, no coiled-coil segments            |
| arCOG08177                   | ESCRT     | TGAM_0988      | TMH <sup>b</sup>                           | Mixed alpha and beta, no coiled-coil segments            |
| arCOG09748                   | ESCRT     | TGAM_0987      | TMH <sup>b</sup>                           | Three coiled-coil segments                               |
| arCOG06794                   | FtsZ-like | MA2712         | PMH <sup>c</sup>                           | Membrane-associated GTPase                               |
| arCOG07815                   | FtsZ-like | MA2710         | PMH <sup>c</sup>                           | Membrane-associated protein                              |
| arCOG07816                   | FtsZ-like | MA2713         | PMH <sup>c</sup>                           | Mixed alpha and beta, no coiled-coil segments            |
| Putative actin-based systems |           |                |                                            |                                                          |
| arCOG05582                   | Actin     | PAE2275        | Thermoproteales, Korarchaeon, Thaumarchaea | Mixed alpha and beta, no coiled-coil segments            |
| arCOG05584                   | Actin     | PAE2278        | Thermoproteales                            | Mixed alpha and beta, with potential coiled-coil segment |
| arCOG07432                   | Actin     | Pars_1812      | Thermoproteales                            | Mixed alpha and beta, no coiled-coil segments            |
| arCOG02900                   | Unknown   | PTO0289        | Many archaea                               | vWA domain containing protein                            |
| arCOG05338                   | Unknown   | PTO0444        | Thermoplasmatales                          | Mixed alpha and beta, with one coiled-coil segment       |

<sup>a</sup> arCOG0731 is present also in a variety of other archaea, interestingly mostly in taxa where VPS4 ATPases were found, but specifically associated with Snf7-like genes only in Sulfolobales;

<sup>b</sup> TMH – three Thermococci, two Methanocaldococcus species and in *Halomicrobium mukohataei*

<sup>c</sup> PMH – *Pyrococcus abyssi*, two Methanosarcinas and two Halobacteria
