# Supplementary material
Source: PubMed Central journal article supplement (PMC3293450)
Supplement: NIHMS353077-supplement-S7.pdf [file NIHMS353077-supplement-S7.pdf]

S7 | Alignment of Snf7 family proteins

Table with columns for protein ID, species, and amino acid sequence. Includes entries for CMHS/VP86, CMHS/VP82, CMHS/VP84, CMHS/VP84, and arCOG09749. The table shows multiple sequence alignments of Snf7 family proteins from various species, with gaps represented by dashes.
