# Supplementary material
Source: PubMed Central journal article supplement (PMC3293450)

S4 | Architecture of operons of all organisms mentioned in this Analysis article

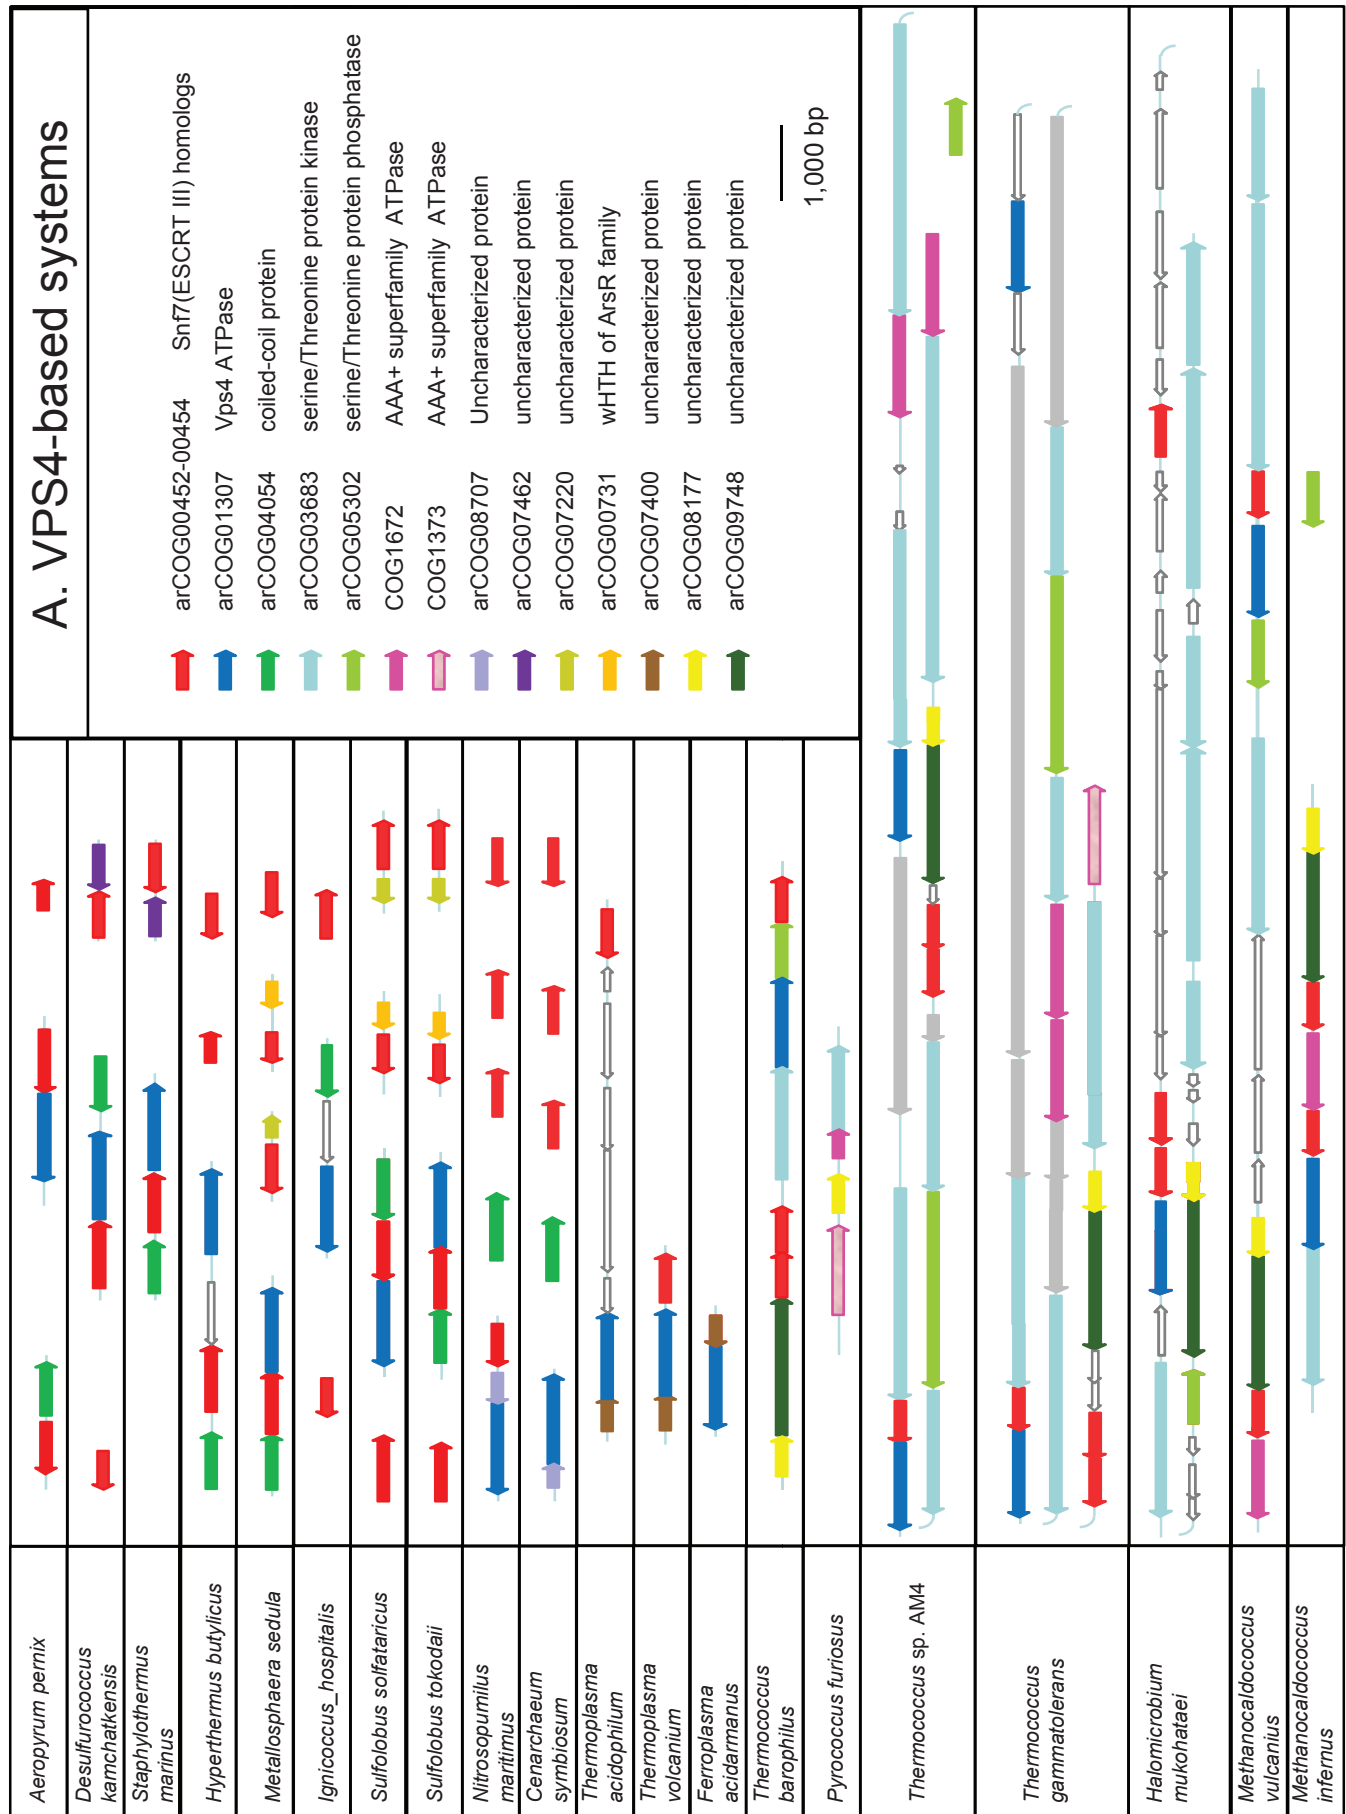

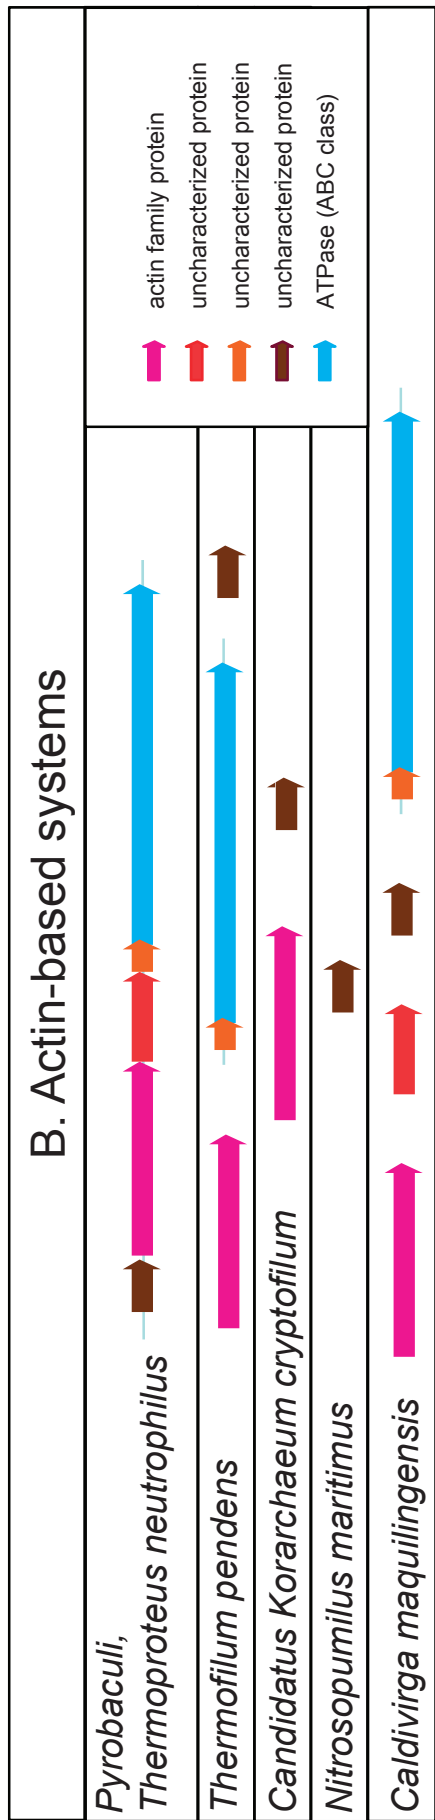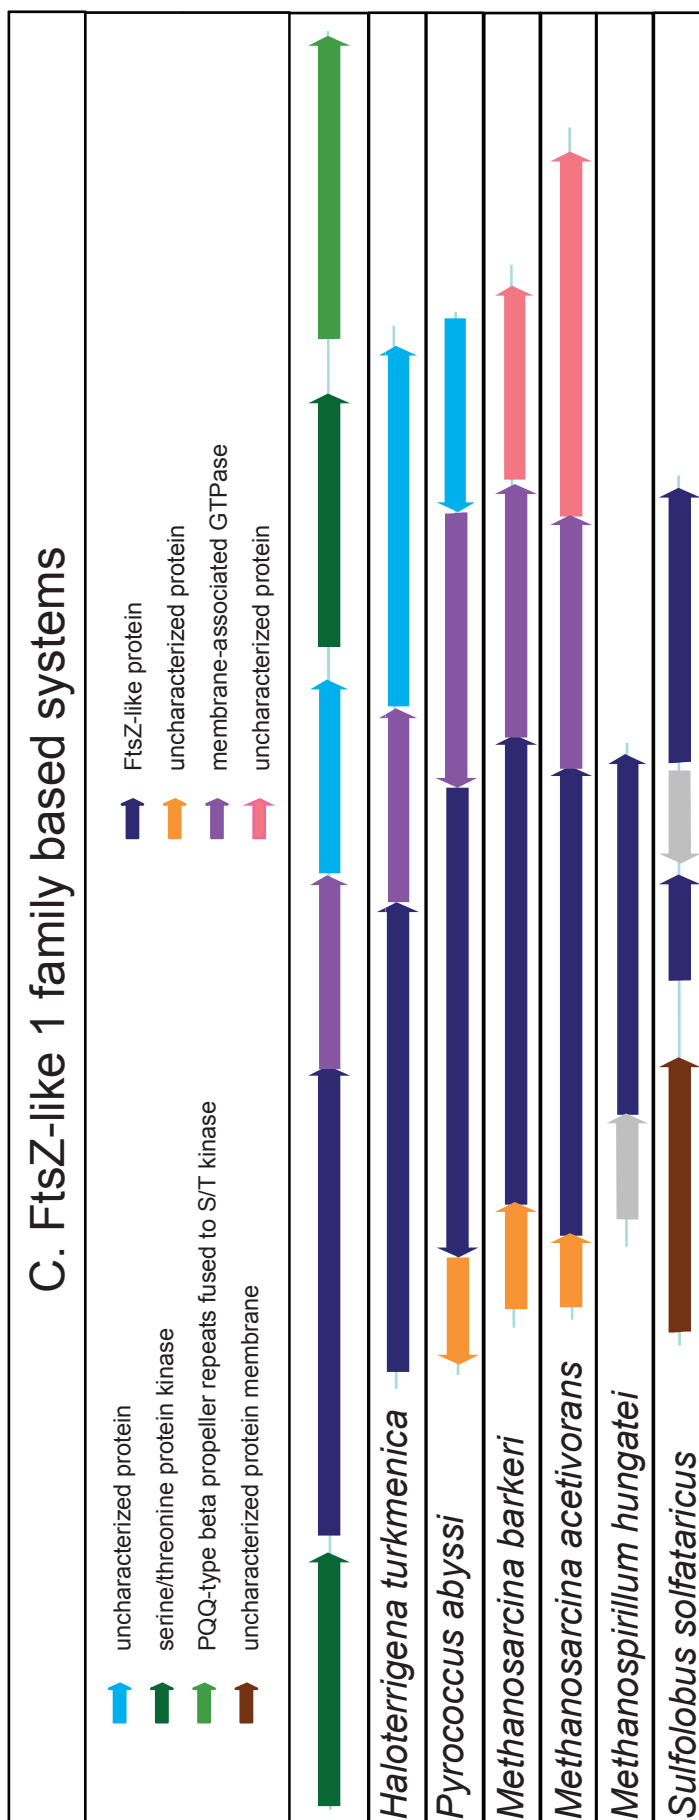

Supplement: NIHMS353077-supplement-S4.pdf [file NIHMS353077-supplement-S4.pdf]
